# The American Journal of Psychiatry

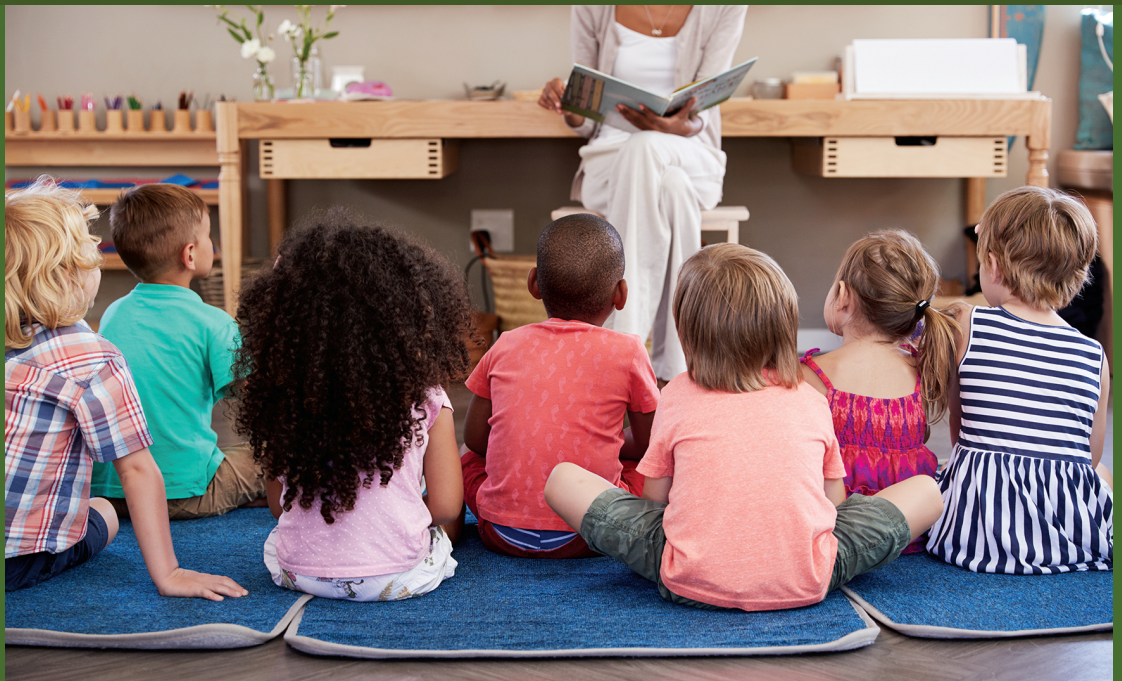

CBT for Prolonged Grief in Children and Adolescents

Reducing Adolescent Psychopathology in Socioeconomically  
Disadvantaged Children With a Preschool Intervention

Association of Inflammatory Activity With Larger  
Neural Responses to Threat and Reward Among  
Children Living in Poverty

Reward Processing in Children With Disruptive Behavior  
Disorders and Callous-Unemotional Traits in the ABCD Study

AMERICAN  
PSYCHIATRIC  
ASSOCIATION

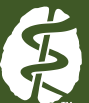

[ajp.psychiatryonline.org](http://ajp.psychiatryonline.org)
